# Supplementary material for: Enhanced removal of oxytetracycline from aquatic solution using MnOx@Fe3O4 bimetallic nanoparticle coated powdered activated carbon: synergism of adsorption and chemical autocatalytic oxidation processes
Source: Royal Society of Chemistry journal article supplement (doi:10.1039/d3en00465a), 2023-01-01
Supplement: d3en00465a1.pdf [file d3en00465a1.pdf]

## *Supplementary materials*

### **Enhanced removal of oxytetracycline from aquatic solution using $\text{MnO}_x@Fe_3O_4$ bimetallic nanoparticle coated powdered activated carbon: synergism of adsorption and chemical autocatalytic oxidation processes**

Jiahui Zhou <sup>a,\*</sup>, Shu Wang <sup>b</sup>

<sup>a</sup> State Key Laboratory of Pollution Control and Resources Reuse, School of Environmental Science and Engineering, Tongji University, Shanghai, 200092, PR China

<sup>b</sup> Department of Pharmaceutics, Nagasaki University Graduate School of Biomedical Sciences, Nagasaki University, Nagasaki, 852-8501, Japan

\* Corresponding author. E-mail address: zhoujiahui1991@126.com (J. Zhou)

7 Tables

9 Figures

13 Pages

## Text S1

### Preparation of MnO<sub>x</sub>@Fe<sub>3</sub>O<sub>4</sub> bimetallic nanoparticles coated powdered activated carbon (MnO<sub>x</sub>@Fe<sub>3</sub>O<sub>4</sub>-PAC)

The 200 mesh acid-washed PAC was chosen as the carbon matrix for MnO<sub>x</sub>@Fe<sub>3</sub>O<sub>4</sub>-PAC synthesis. 3.9 g FeCl<sub>3</sub>·6H<sub>2</sub>O and 1.4 g FeCl<sub>2</sub>·4H<sub>2</sub>O were dissolved in a beaker with 450 mL ultrapure water at 80°C. 3.3 g PAC was added into the solution, and then 5M NaOH solution was added dropwise (volume: 50 mL; velocity: 10 mL/min) into the suspension, mechanical stirring for 1h, and maturing for 2h. After removing the supernatant, the remains were mixed with 2.3 g MnCl<sub>2</sub>·4H<sub>2</sub>O in the beaker with 400 mL fresh ultrapure water, and temperature was remained at 80°C. The aqueous solution contained 6.0 g/L KMnO<sub>4</sub> and 3.0 g/L NaOH was added dropwise (volume: 200 mL; velocity: 10 mL/min) into the suspension, mechanical stirring for 1h, and maturing for 2h. After removing the supernatant, the remains were dried overnight, washed with ultrapure water to neutral pH, freeze-dried and hermetical stored until use. Eventually, MnO<sub>x</sub>@Fe<sub>3</sub>O<sub>4</sub>-PAC was synthesized with a mass ratio of 1/1/2 for MnO<sub>x</sub>/Fe<sub>3</sub>O<sub>4</sub>/PAC.

## Text S2

### Adsorption isotherms

The Langmuir and Freundlich isotherm models were included as follows:

$$q_e = \frac{K_L q_m C_e}{1 + K_L C_e}$$
$$q_e = K_F C_e^{\frac{1}{n}}$$

where  $q_e$  (mg/g) and  $q_m$  (mg/g) were the equilibrium adsorption capacity and the maximum adsorption capacity of OTC, respectively;  $C_e$  (mg/L) was the equilibrium concentration of OTC;  $K_L$  and  $K_F$  were the constants of Langmuir and Freundlich, respectively;  $1/n$  was surface heterogeneity or adsorption intensity.

### Adsorption kinetics

The pseudo-first order, pseudo-second order, Elovich model, and intraparticle diffusion equations were included as follows:

$$q_t = q_e - q_e e^{-k_1 t}$$

$$q_t = \frac{k_2 q_e^2 t}{1 + k_2 q_e t}$$

$$q_t = \frac{1}{\beta_E} \ln \frac{\alpha_E}{\beta_E} + \frac{1}{\beta_E} \ln t$$

$$q_t = k_{id} t^{\frac{1}{2}} + L$$

where  $q_e$  (mg/g) and  $q_t$  (mg/g) were the adsorption capacity of OTC at the equilibrium time and time  $t$ , respectively;  $k_1$  ( $\text{min}^{-1}$ ) was the pseudo-first-order model rate constant;  $k_2$  ( $\text{g} \cdot \text{mg}^{-1} \cdot \text{min}^{-1}$ ) was the pseudo-second-order model rate constant;  $t$  (min) was the adsorption time;  $\alpha_E$  ( $\text{mg} \cdot \text{g}^{-1} \cdot \text{min}^{-1}$ ) and  $\beta_E$  ( $\text{g} \cdot \text{mg}^{-1}$ ) were Elovich constants;  $k_{id}$  ( $\text{mg} \cdot \text{g}^{-1} \cdot \text{min}^{-0.5}$ ) was the intraparticle diffusion rate.

### Adsorption thermodynamics

The adsorption thermodynamic equations were included as follows:

$$\Delta G^0 = -RT \ln K_D$$

$$K_D = \frac{C_A}{C_e}$$

$$\ln K_D = \frac{\Delta S^0}{R} - \frac{\Delta H^0}{RT}$$

where  $\Delta G^0$  ( $\text{kJ} \cdot \text{mol}^{-1}$ ),  $\Delta H^0$  ( $\text{kJ} \cdot \text{mol}^{-1}$ ), and  $\Delta S^0$  ( $\text{kJ} \cdot \text{mol}^{-1} \cdot \text{K}^{-1}$ ) were Gibbs free energy, standard enthalpy, and standard entropy, respectively;  $R$  was the universal gas constant ( $8.314 \text{ J} \cdot \text{mol}^{-1} \cdot \text{K}^{-1}$ );  $C_A$  and  $C_e$  were the concentration of OTC in the solid phase and the liquid phase at the equilibrium time, respectively;  $T$  (K) was the temperature.

### Text S3

#### Analysis of OTC and Intermediates

The residual concentration of OTC was determined using high-performance liquid chromatography (HPLC) with a Zorbax Eclipse XDB-C18 column ( $4.6 \text{ mm} \times 150 \text{ mm}$ ,  $5 \mu\text{m}$ , Agilent, USA) on an Agilent 1200 Infinity system. The mobile phase consisted of a mixture of sodium dihydrogen phosphate solution ( $0.01 \text{ mol/L}$ ) and acetonitrile ( $80:20$ , v/v). The column temperature was set at  $35 \text{ }^\circ\text{C}$ , and the mobile phase flow rate was maintained at 1

mL/min. A sample injection volume of 10  $\mu$ L was used, and detection was performed at a wavelength of 268 nm.

The intermediates of OTC were identified using ultra-performance liquid chromatography-mass spectrometry (UPLC-MS) on an Agilent 1290 UPLC system coupled with a Q-TOF 6550 mass spectrometer (Agilent, USA). The mobile phase consisted of a mixture of formic acid solution (0.1%, m/m) and acetonitrile (90:10, v/v). The column temperature was set at 40°C, and the injection volume was 5  $\mu$ L. The mobile phase flow rate was maintained at 0.3 mL/min. ESI (electrospray ionization) in positive ion mode was used for the estimation of OTC and its intermediates.

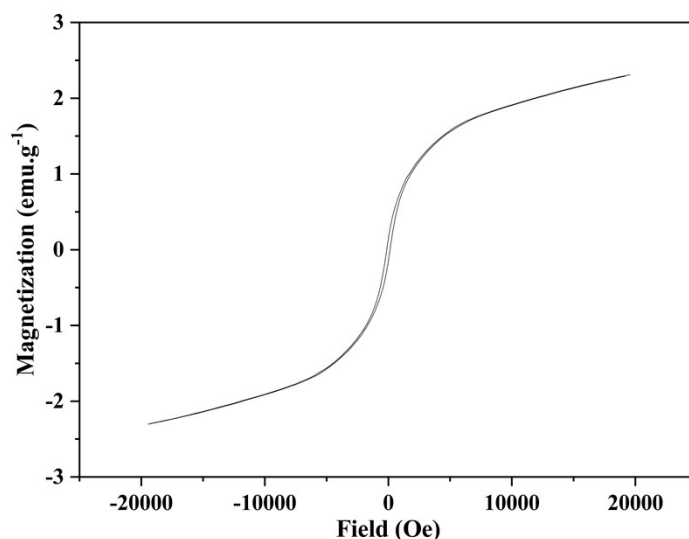

**Fig. S1.** VSM magnetization curves of  $\text{MnO}_x@Fe_3O_4$ -PAC.

**Table S1.** Aperture parameters of PAC and  $\text{MnO}_x@Fe_3O_4$ -PAC.

| Sample                      | BET                                                             | BJH                                            | Macropore<br>volume<br>/mL.g <sup>-1</sup> | Mesopore<br>volume<br>/mL.g <sup>-1</sup> | Micropore<br>volume<br>/mL.g <sup>-1</sup> |
|-----------------------------|-----------------------------------------------------------------|------------------------------------------------|--------------------------------------------|-------------------------------------------|--------------------------------------------|
|                             | specific<br>surface<br>area<br>/m <sup>2</sup> .g <sup>-1</sup> | total<br>pore<br>volume<br>/mL.g <sup>-1</sup> |                                            |                                           |                                            |
| PAC                         | 347.54                                                          | 0.25                                           | 0.03                                       | 0.12                                      | 0.10                                       |
| $\text{MnO}_x@Fe_3O_4$ -PAC | 222.89                                                          | 0.37                                           | 0.04                                       | 0.27                                      | 0.06                                       |

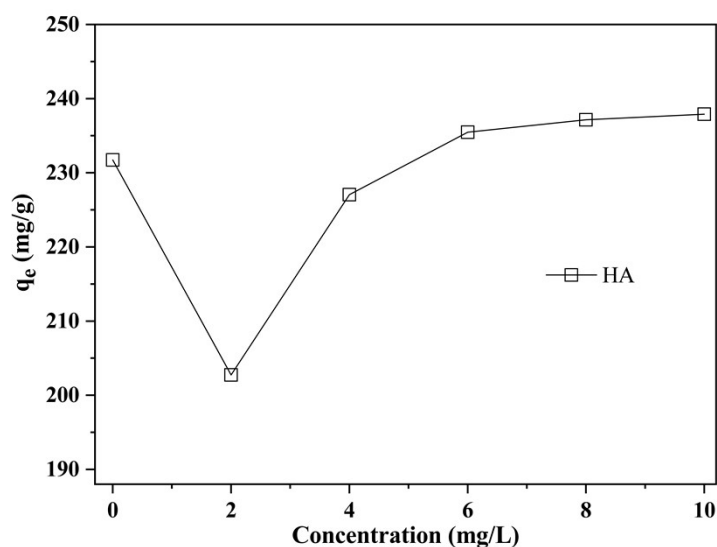

**Fig. S2.** Effect of HA on OTC adsorption on  $\text{MnO}_x@Fe_3O_4\text{-PAC}$ . Reaction conditions:  $\text{OTC}_0 = 150$  ppm,  $\text{MnO}_x@Fe_3O_4\text{-PAC}$  dosage = 0.5 g/L, initial pH = 3.

**Table S2.** The parameters of Langmuir and Freundlich isotherms for the adsorption of OTC on PAC and  $\text{MnO}_x@Fe_3O_4\text{-PAC}$ .

| Sample                            | Langmuir isotherms                      |       |       | Freundlich isotherms          |       |       |
|-----------------------------------|-----------------------------------------|-------|-------|-------------------------------|-------|-------|
|                                   | $q_e = \frac{K_L q_m C_e}{1 + K_L C_e}$ |       |       | $q_e = K_F C_e^{\frac{1}{n}}$ |       |       |
|                                   | $q_m$                                   | $K_L$ | $R^2$ | $K_F$                         | $n$   | $R^2$ |
| PAC                               | 285.558                                 | 0.598 | 0.832 | 111.041                       | 4.146 | 0.979 |
| $\text{MnO}_x@Fe_3O_4\text{-PAC}$ | 284.800                                 | 0.063 | 0.915 | 47.159                        | 2.574 | 0.973 |

**Table S3.** The maximal adsorption capacity of OTC on different adsorbents.

| Adsorption materials                             | $q_m$ (mg/g) | Isotherm model   | References |
|--------------------------------------------------|--------------|------------------|------------|
| $\text{MnO}_x@Fe_3O_4\text{-PAC}$                | 231.7        | Freundlich       | This Study |
| zeolite/ $Fe_3O_4$                               | 27.1         | Langmuir         | 1          |
| $Fe_3O_4\text{-HA-La}$                           | 23.4         | Redlich-Peterson | 2          |
| Surfactant-modified-alumina                      | 143.0        | two-step model   | 3          |
| Multi-walled carbon nanotubes                    | 73.0         | Freundlich       | 4          |
| Polyaniline coated peanut shells                 | 65.5         | Langmuir         | 5          |
| Graphene oxide functionalized magnetic particles | 45.0         | Langmuir         | 6          |

**Table S4.** Parameters of adsorption kinetic models of OTC on  $\text{MnO}_x@\text{Fe}_3\text{O}_4\text{-PAC}$ .

| $C_i$<br>mg.L <sup>-1</sup> | $q_{e,\text{max}}$<br>mg.g <sup>-1</sup> | pseudo-first-order model |       |       | pseudo-second-order model |        |       | Elovich model |           |       | Intra-particle diffusion model |       |                     |       |
|-----------------------------|------------------------------------------|--------------------------|-------|-------|---------------------------|--------|-------|---------------|-----------|-------|--------------------------------|-------|---------------------|-------|
|                             |                                          | $q_{e,\text{cal}}$       | $k_1$ | $R^2$ | $q_{e,\text{cal}}$        | $k_2$  | $R^2$ | $\alpha_E$    | $\beta_E$ | $R^2$ | $k_{\text{stage1}}$            | $R^2$ | $k_{\text{stage2}}$ | $R^2$ |
| 75                          | 111.659                                  | 101.893                  | 0.084 | 0.942 | 108.753                   | 0.0012 | 0.983 | 1.831         | 0.079     | 0.999 | 5.236                          | 0.976 | 2.026               | 0.946 |
| 150                         | 189.654                                  | 168.645                  | 0.084 | 0.936 | 180.693                   | 0.0007 | 0.974 | 0.768         | 0.046     | 0.994 | 13.270                         | 0.968 | 4.494               | 0.972 |
| 225                         | 240.528                                  | 218.003                  | 0.081 | 0.949 | 233.256                   | 0.0006 | 0.985 | 0.628         | 0.036     | 0.998 | 16.524                         | 0.961 | 4.771               | 0.964 |
| 300                         | 293.270                                  | 259.400                  | 0.088 | 0.934 | 277.289                   | 0.0005 | 0.975 | 0.689         | 0.031     | 0.997 | 17.488                         | 0.965 | 6.792               | 0.997 |

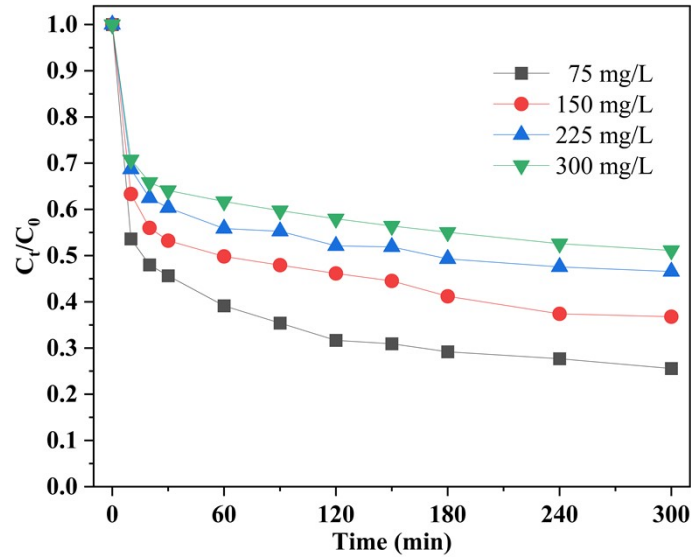**Fig. S3.** OTC removal efficiency of  $\text{MnO}_x@\text{Fe}_3\text{O}_4\text{-PAC}$  at different initial OTC concentrations.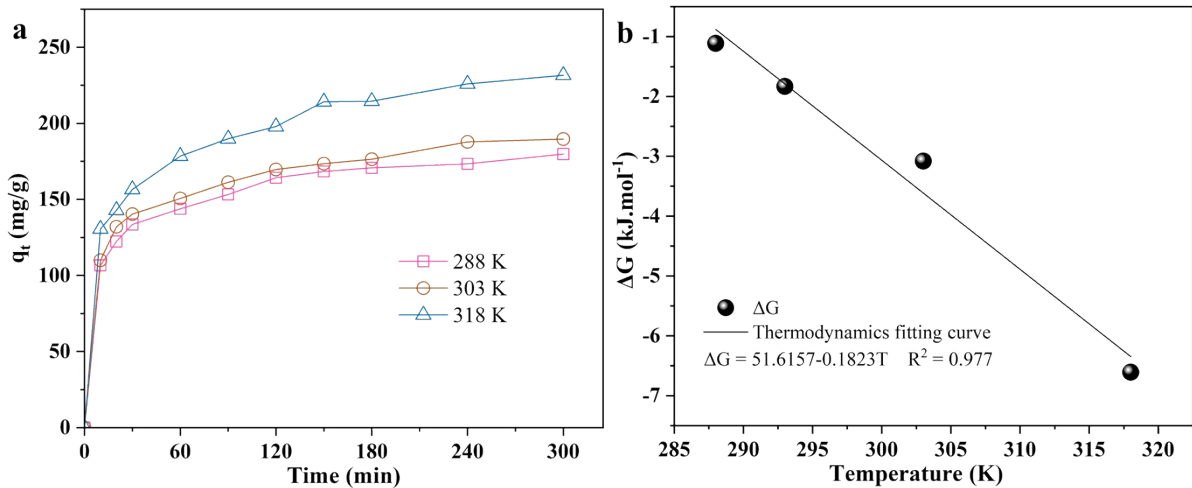**Fig. S4.** The influence of temperature (a); and the thermodynamic fitting curve (b) for OTC adsorption on  $\text{MnO}_x@\text{Fe}_3\text{O}_4\text{-PAC}$ . Reaction conditions:  $\text{OTC}_0 = 150$  ppm,  $\text{MnO}_x@\text{Fe}_3\text{O}_4\text{-PAC}$  dosage = 0.5 g/L, initial pH = 3.

**Table S5.** Thermodynamic parameters for the adsorption of OTC on  $\text{MnO}_x@Fe_3O_4\text{-PAC}$ .

| $T/K$ | $\Delta G^0/(\text{kJ}\cdot\text{mol}^{-1})$ | $\Delta H^0/(\text{kJ}\cdot\text{mol}^{-1})$ | $\Delta S^0/(\text{kJ}\cdot(\text{mol}\cdot\text{K})^{-1})$ |
|-------|----------------------------------------------|----------------------------------------------|-------------------------------------------------------------|
| 288   | -1.11                                        |                                              |                                                             |
| 293   | -1.83                                        |                                              |                                                             |
| 303   | -3.08                                        | 51.62                                        | 0.18                                                        |
| 318   | -6.61                                        |                                              |                                                             |

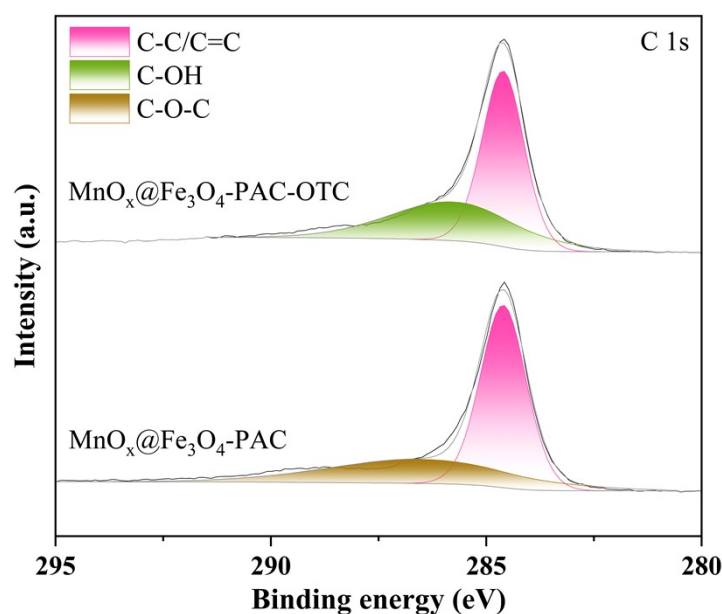**Fig. S5.** XPS spectra of C 1s for  $\text{MnO}_x@Fe_3O_4\text{-PAC}$  before and after reaction.**Table S6.** XPS results for the relative atomic percentages of C 1s on  $\text{MnO}_x@Fe_3O_4\text{-PAC}$  before and after reaction.

| Sample                                | C-C/C=C | C-OH  | C-O-C |
|---------------------------------------|---------|-------|-------|
| $\text{MnO}_x@Fe_3O_4\text{-PAC}$     | 65.4%   | n.d.  | 34.6% |
| $\text{MnO}_x@Fe_3O_4\text{-PAC-OTC}$ | 59.8%   | 40.2% | n.d.  |

Compared with  $\text{MnO}_x@Fe_3O_4\text{-PAC}$  before reaction, the states of C 1s were significantly changed in  $\text{MnO}_x@Fe_3O_4\text{-PAC}$  after reaction, the peak of C-O-C (286.5 eV) disappeared and new peak of C-OH (285.8 eV) appeared, indicating the surface properties of  $\text{MnO}_x@Fe_3O_4\text{-PAC}$  changed during the reaction.

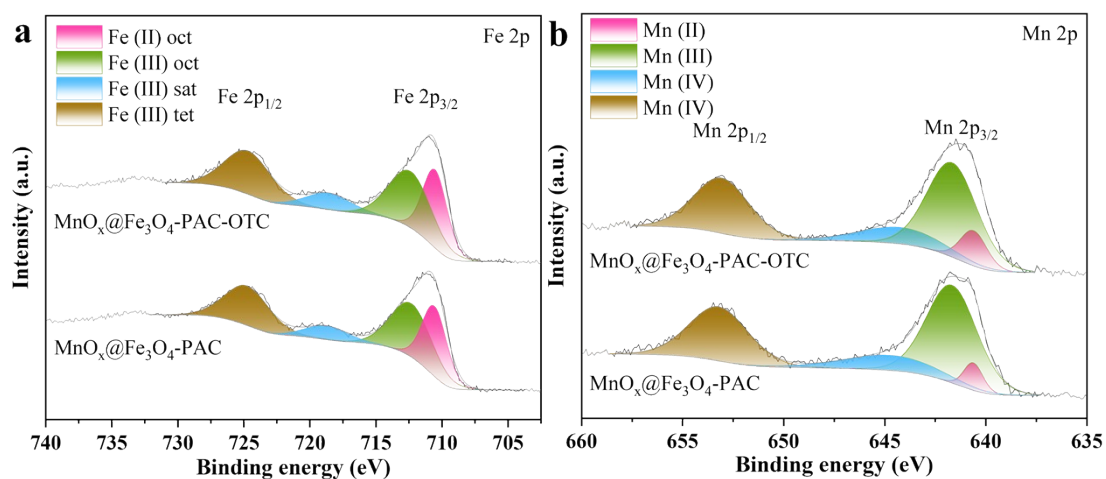

**Fig. S6.** XPS spectra of Fe 2p (a) and Mn 2p (b) for  $\text{MnO}_x@Fe_3O_4\text{-PAC}$  before and after reaction.

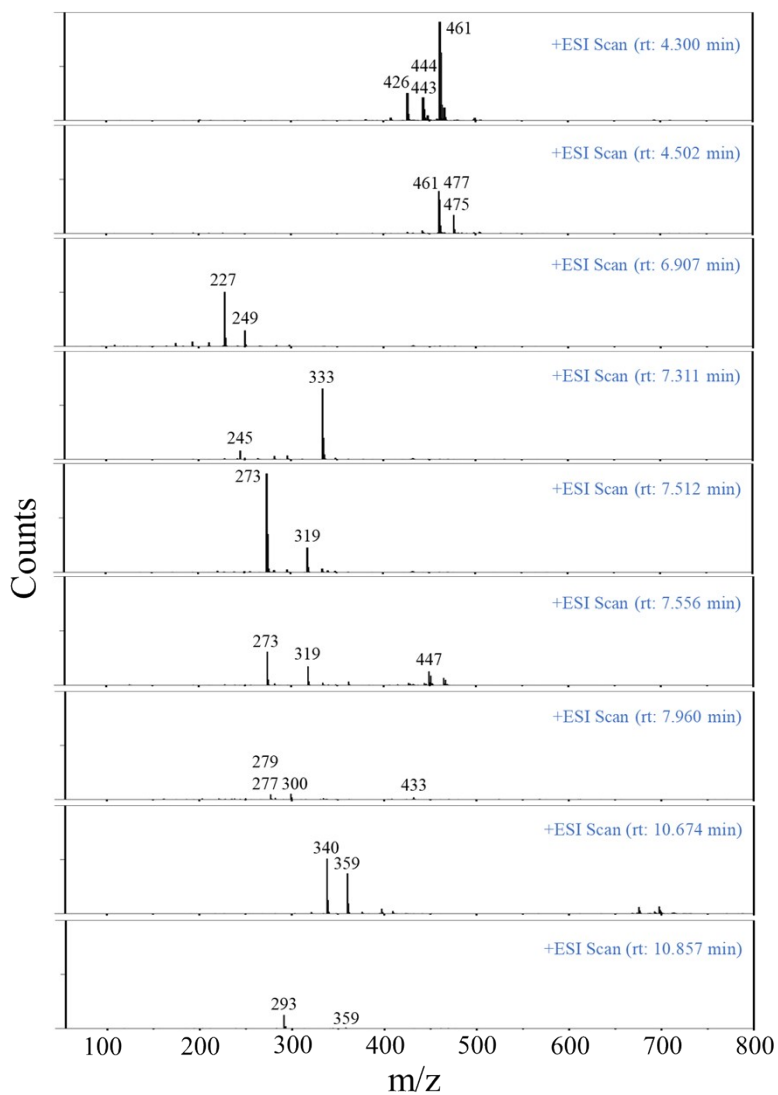

**Fig. S7.** MS spectra of intermediates generated during the chemical autocatalytic oxidation process.



**Table S7.** Potential intermediates identified in the chemical autocatalytic oxidation process.

| Compound | [M+H] <sup>+</sup> | Molecular structural formula                                                                                                                                                       |
|----------|--------------------|------------------------------------------------------------------------------------------------------------------------------------------------------------------------------------|
| OTC      | 461                | 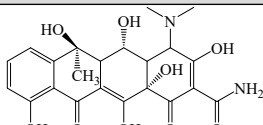 <p>Chemical Formula: C<sub>22</sub>H<sub>24</sub>N<sub>2</sub>O<sub>9</sub><br/>m/z: 461</p>    |
| 1        | 443                |  <p>Chemical Formula: C<sub>22</sub>H<sub>22</sub>N<sub>2</sub>O<sub>8</sub><br/>m/z: 443</p>    |
| 2        | 477                |  <p>Chemical Formula: C<sub>22</sub>H<sub>24</sub>N<sub>2</sub>O<sub>10</sub><br/>m/z: 477</p>   |
| 3        | 443                |  <p>Chemical Formula: C<sub>22</sub>H<sub>22</sub>N<sub>2</sub>O<sub>8</sub><br/>m/z: 443</p>    |
| 4        | 447                |  <p>Chemical Formula: C<sub>21</sub>H<sub>22</sub>N<sub>2</sub>O<sub>9</sub><br/>m/z: 447</p>  |
| 5        | 444                |  <p>Chemical Formula: C<sub>22</sub>H<sub>21</sub>NO<sub>9</sub><br/>m/z: 444</p>              |
| 6        | 433                |  <p>Chemical Formula: C<sub>21</sub>H<sub>24</sub>N<sub>2</sub>O<sub>8</sub><br/>m/z: 433</p>  |
| 7        | 300                |  <p>Chemical Formula: C<sub>18</sub>H<sub>21</sub>NO<sub>3</sub><br/>m/z: 300</p>              |
| 8        | 340                |  <p>Chemical Formula: C<sub>19</sub>H<sub>17</sub>NO<sub>3</sub><br/>m/z: 340</p>              |
| 9        | 475                |  <p>Chemical Formula: C<sub>22</sub>H<sub>22</sub>N<sub>2</sub>O<sub>10</sub><br/>m/z: 475</p> |

|    |     |                                                                                                                                                                      |
|----|-----|----------------------------------------------------------------------------------------------------------------------------------------------------------------------|
| 10 | 293 | 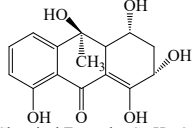 <p>Chemical Formula: C<sub>15</sub>H<sub>16</sub>O<sub>6</sub><br/>m/z: 293</p>   |
| 11 | 359 |  <p>Chemical Formula: C<sub>19</sub>H<sub>18</sub>O<sub>7</sub><br/>m/z: 359</p>   |
| 12 | 426 |  <p>Chemical Formula: C<sub>22</sub>H<sub>19</sub>NO<sub>8</sub><br/>m/z: 426</p>  |
| 13 | 293 |  <p>Chemical Formula: C<sub>15</sub>H<sub>16</sub>O<sub>6</sub><br/>m/z: 293</p>   |
| 14 | 319 |  <p>Chemical Formula: C<sub>17</sub>H<sub>18</sub>O<sub>6</sub><br/>m/z: 319</p>  |
| 15 | 333 |  <p>Chemical Formula: C<sub>17</sub>H<sub>16</sub>O<sub>7</sub><br/>m/z: 333</p> |
| 16 | 279 |  <p>Chemical Formula: C<sub>14</sub>H<sub>14</sub>O<sub>6</sub><br/>m/z: 279</p> |
| 17 | 277 |  <p>Chemical Formula: C<sub>15</sub>H<sub>16</sub>O<sub>5</sub><br/>m/z: 277</p> |
| 18 | 273 |  <p>Chemical Formula: C<sub>16</sub>H<sub>16</sub>O<sub>4</sub><br/>m/z: 273</p> |
| 19 | 245 |  <p>Chemical Formula: C<sub>14</sub>H<sub>12</sub>O<sub>4</sub><br/>m/z: 245</p> |

|    |     |                                                                                                                                                                    |
|----|-----|--------------------------------------------------------------------------------------------------------------------------------------------------------------------|
| 20 | 245 | 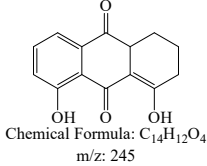<br>Chemical Formula: C <sub>14</sub> H <sub>12</sub> O <sub>4</sub><br>m/z: 245 |
| 21 | 227 | <br>Chemical Formula: C <sub>15</sub> H <sub>14</sub> O <sub>2</sub><br>m/z: 227 |
| 22 | 249 | <br>Chemical Formula: C <sub>13</sub> H <sub>12</sub> O <sub>5</sub><br>m/z: 249 |

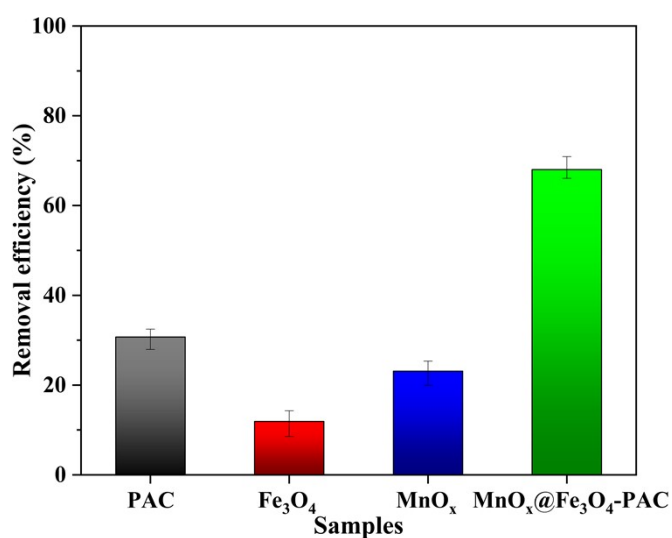

**Fig. S8.** Comparison of OTC removal contributions of PAC, Fe<sub>3</sub>O<sub>4</sub>, MnO<sub>x</sub>, and MnO<sub>x</sub>@Fe<sub>3</sub>O<sub>4</sub>-PAC.

#### Text S4

##### Regeneration of MnO<sub>x</sub>@Fe<sub>3</sub>O<sub>4</sub>-PAC

The experiments were conducted in 500 mL of OTC solution (50 ppm, pH = 3.0) with 0.25 g MnO<sub>x</sub>@Fe<sub>3</sub>O<sub>4</sub>-PAC in a thermostatic mechanical stirring bath at 303 K. After the experiment, MnO<sub>x</sub>@Fe<sub>3</sub>O<sub>4</sub>-PAC was separated from the aqueous solution by outside magnetic field, and then ultrasonically washed five times with 50 mL of methanol. Subsequently, the desorbed MnO<sub>x</sub>@Fe<sub>3</sub>O<sub>4</sub>-PAC was added into fresh OTC solution for the next cycle.

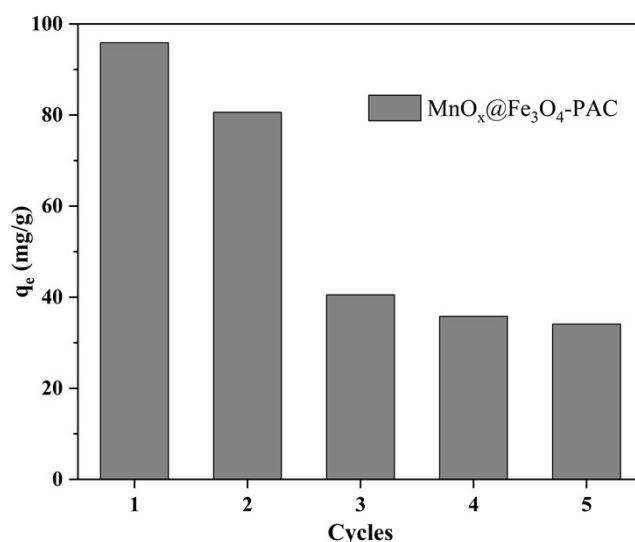

**Fig. S9.** Regeneration ability of  $\text{MnO}_x@Fe_3O_4$ -PAC for OTC removal.

## References

- 1 G. Başkan, Ü. Açikel, M. Levent, Investigation of adsorption properties of oxytetracycline hydrochloride on magnetic zeolite/ $Fe_3O_4$  particles, *Adv. Powder Technol.*, 2022, **33**, 103600.
- 2 C. H. Yan, L. Fan, Y. Chen, Y. T. Xiong, Effective adsorption of oxytetracycline from aqueous solution by lanthanum modified magnetic humic acid, *Colloids Surf. A.*, 2020, **602**, 125135.
- 3 T. D. Pham, T. T. Tran, V. A. Le, T. T. Pham, T. H. Dao, T. S. Le, Adsorption characteristics of molecular oxytetracycline onto alumina particles: The role of surface modification with an anionic surfactant, *J. Mol. Liq.*, 2019, **287**, 110900.
- 4 P. Oleszczuk, B. S. Xing, Influence of anionic, cationic and nonionic surfactants on adsorption and desorption of oxytetracycline by ultrasonically treated and non-treated multiwalled carbon nanotubes, *Chemosphere*, 2011, **85**, 1312-1317.

- 5 F. Belaib, M. Azzedine, B. Boubeker, M. Abdeslam-Hassen, Experimental study of oxytetracycline retention by adsorption onto polyaniline coated peanut shells, *Int. J. Hydrogen Energy*, 2014, **39**, 1511-1515.
- 6 Y. X. Lin, S. Xu, L. Jia, Fast and highly efficient tetracyclines removal from environmental waters by graphene oxide functionalized magnetic particles, *Chem. Eng. J.*, 2013, **225**, 679-685.
